# Supplementary material for: Antioxidative and Anti-Melanogenic Activities of Bamboo Stems (Phyllostachys nigra variety henosis) via PKA/CREB-Mediated MITF Downregulation in B16F10 Melanoma Cells
Source: MDPI journal article supplement (doi:10.3390/ijms19020409), 2018-01-30
Supplement: s1 [file s1]

Table S1. Linear regression equation of radical scavenging assay results

|                  | DPPH                   | ABTS                   | Hydroxyl radical       |
|------------------|------------------------|------------------------|------------------------|
| PN1              | $y = 0.0119x + 37.299$ | $y = 0.0305x + 28.445$ | $y = 0.8485x + 10.527$ |
| PN2              | $y = 0.0248x + 32.268$ | $y = 0.0284x + 36.827$ | $y = 0.0334x + 26.633$ |
| PN3              | $y = 0.0265x + 35.005$ | $y = 0.0291x + 37.934$ | $y = 0.0291x + 33.675$ |
| PN4              | $y = 0.0102x + 29.424$ | $y = 0.0316x + 28.804$ | $y = 0.029x + 35.211$  |
| PN5              | $y = 0.0207x + 31.823$ | $y = 0.0067x + 35.011$ | $y = 0.0335x + 24.309$ |
| Positive control | $y = 0.6159x + 35.822$ | $y = 0.9846x - 1.0621$ | $y = 0.0156x + 26.222$ |

PN1, EtOAc fraction of autoclaving extract; PN2, EtOAc fraction of 50% EtOH extract; PN3, EtOAc fraction of 80% EtOH extract; PN4 EtOAc fraction of 100% EtOH extract; PN5, EtOAc fraction of hot water extract; Positive control, ascorbic acid  
Data is mean±standard deviation (SD) of three times experiments.

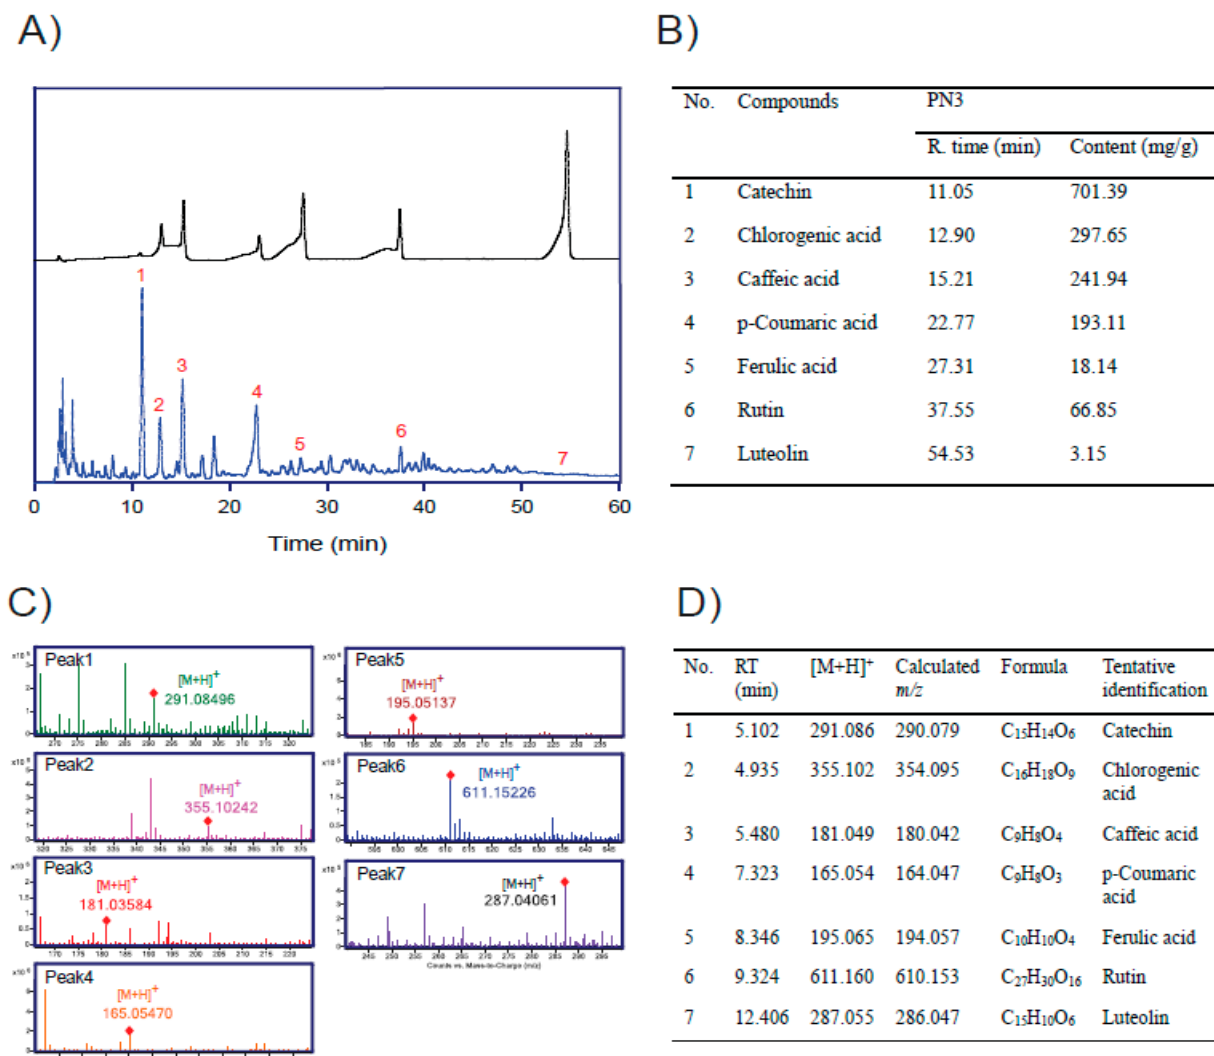

Figure S1. (A) High-performance liquid chromatography (HPLC) chromatograms, (B) contents of the seven compounds, (C) liquid chromatography coupled with quadrupole time-of-flight mass spectrometry (LC-Q-TOF-MS) chromatograms, (D) and mass spectrometry (MS) data of the seven compounds in PN3. Unnumbered peaks of (A) were unknown.
